# Supplementary material for: Detecting monogenic obesity: a systematic exome-wide workup of over 500 individuals
Source: Springer Nature journal article supplement (doi:10.1038/s41366-025-01819-0), 2025-06-16
Supplement: MOESM1 [file 41366_2025_1819_MOESM1_ESM.pdf › 41366_2025_1819_MOESM1_ESM.pdf]

## **Supplementary Information**

- **Supp. Fig. 1:** Flowchart describing the study's cohort selection process: *p.2*
- **Supp. Fig. 2:** Yields in further subgroups *p.3*
- **Supp. Table 1:** List of all genes included in the TruSight One Sequencing Panel (May 2014): *additional excel file*
- **Supp. Table 2:** Characteristics of patients in this study: *p.4*
- **Supp. Table 3:** Diagnostic yield in subgroups of patients: *p.5*
- **Supp. Table 4:** Comparison of affected genes in solved cases with obesity panel genes: *p.6*

Patients who received genetic testing at the Institute of Human Genetics, Leipzig  
(from 2016-2023, for any indication)

Supplementary Figure 1 - Inclusion criteria

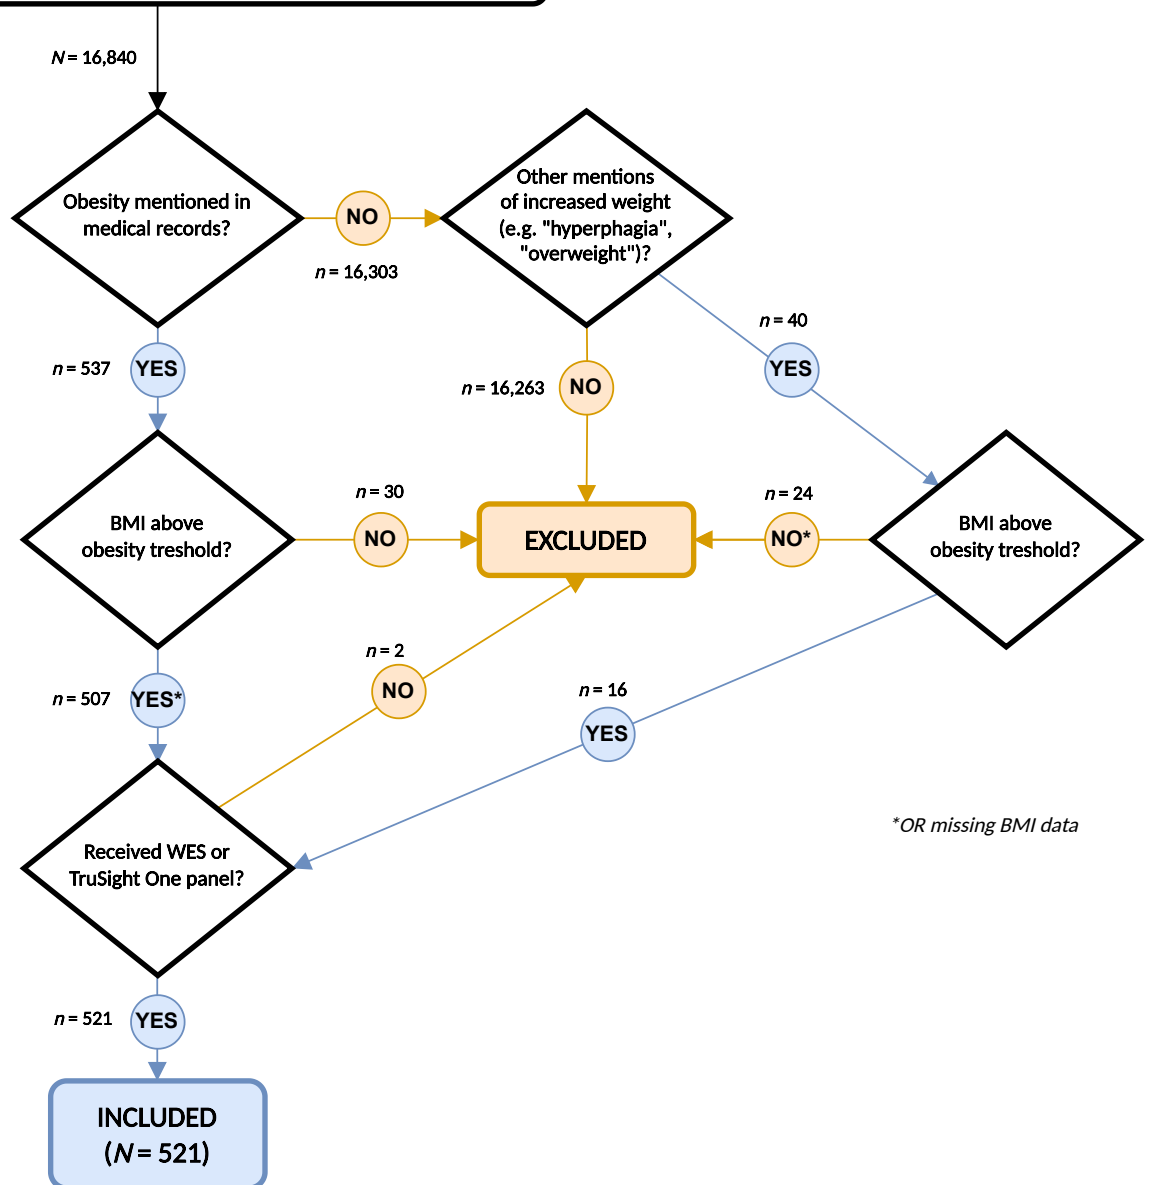

Supplementary Figure 2

A: Subgroup yields in children and adults

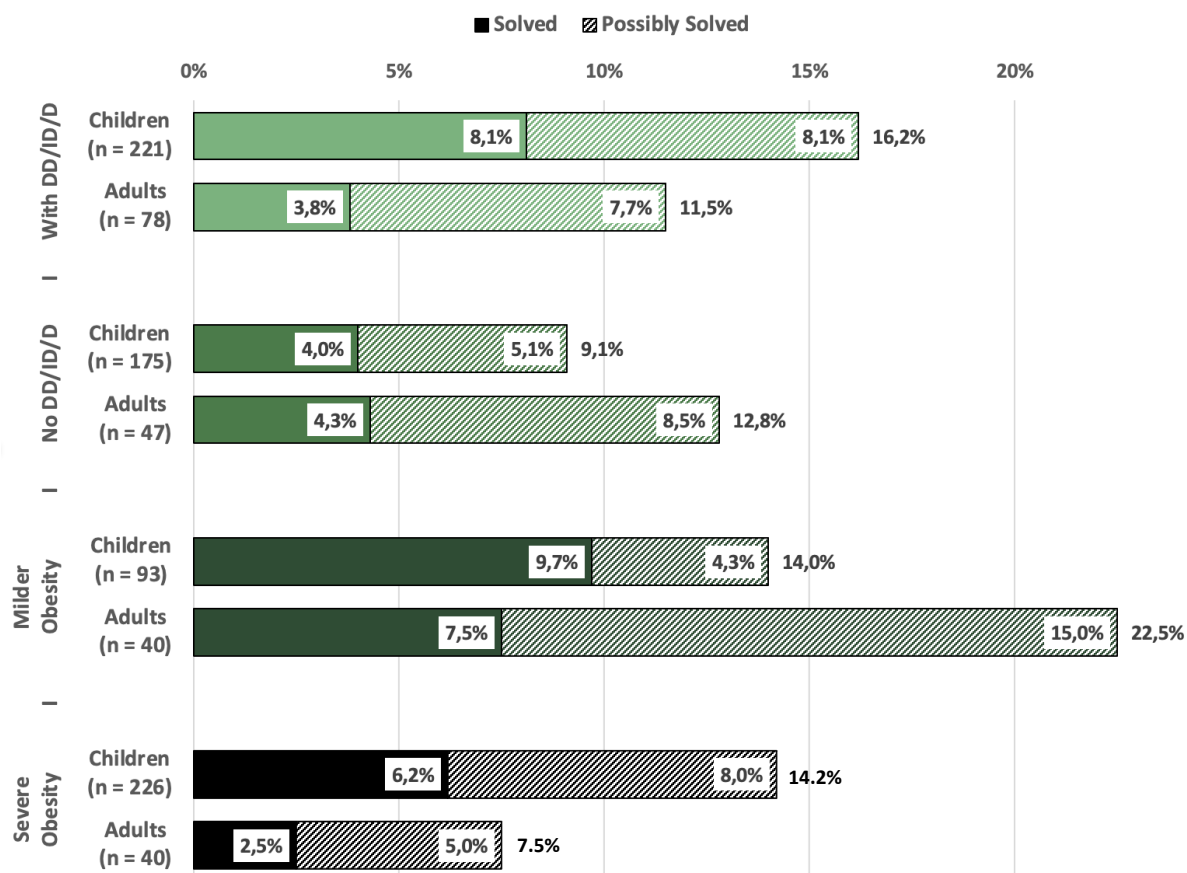

B: Yields in patients with non-syndromic obesity, depending on the severity of obesity

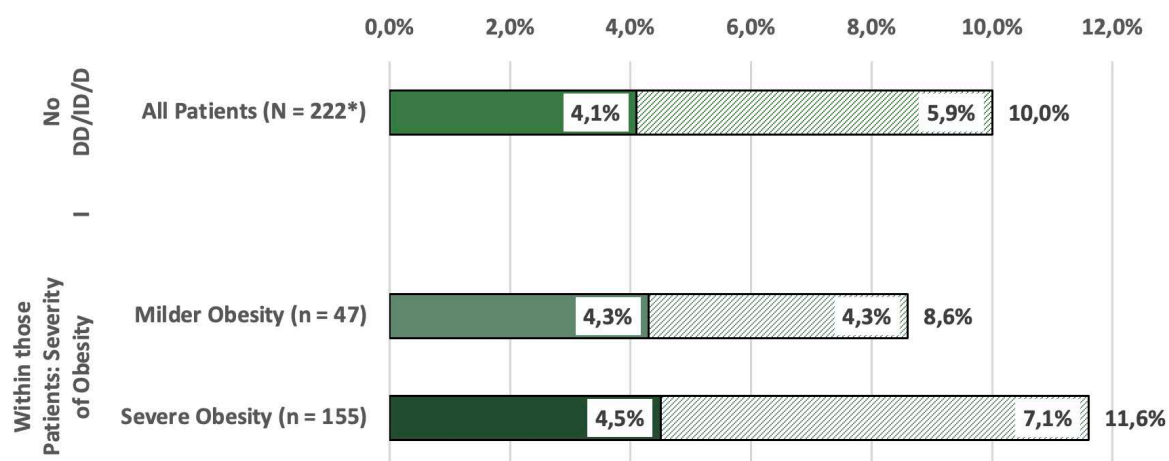

\*20 patients with missing BMI data, all unsolved

Supplementary Table 2 - Patient Characteristics

|                                   | All Patients (N = 521) |       | Solved (n = 30, 5.8%) |       | Possibly solved (n = 37, 7.1%) |       | Unsolved (n = 454, 87.1%) |       |
|-----------------------------------|------------------------|-------|-----------------------|-------|--------------------------------|-------|---------------------------|-------|
| <b>Sex (n, %)</b>                 |                        |       |                       |       |                                |       |                           |       |
| Male                              | 286                    | 54.9% | 17                    | 56.7% | 23                             | 62.2% | 246                       | 54.2% |
| Female                            | 235                    | 45.1% | 13                    | 43.3% | 14                             | 37.8% | 208                       | 45.8% |
| <b>Age (n, %)</b>                 |                        |       |                       |       |                                |       |                           |       |
| Children                          | 396                    | 76.0% | 25                    | 83.3% | 27                             | 73.0% | 344                       | 75.8% |
| Adults                            | 125                    | 24.0% | 5                     | 16.7% | 10                             | 27.0% | 110                       | 24.2% |
| Mean, Median (years)              | 16.3, 12.8             |       | 13.8, 13.1            |       | 17.3, 14.4                     |       | 16.4, 12.7                |       |
| Range (years)                     | 0.3 – 79.8             |       | 0.4 – 50.2            |       | 1.6 – 57.6                     |       | 0.3 – 79.8                |       |
| <b>Other Symptoms (n, %)</b>      |                        |       |                       |       |                                |       |                           |       |
| Additional DD/ID/D                | 299                    | 57.4% | 21                    | 70.0% | 24                             | 64.9% | 254                       | 55.9% |
| No DD/ID/D                        | 222                    | 42.6% | 9                     | 30.0% | 13                             | 35.1% | 200                       | 44.1% |
| <b>Severity of Obesity (n, %)</b> |                        |       |                       |       |                                |       |                           |       |
| Milder Obesity                    | 133                    | 25.5% | 12                    | 40.0% | 10                             | 27.0% | 111                       | 24.4% |
| Severe Obesity                    | 266                    | 51.1% | 14                    | 46.7% | 20                             | 54.1% | 232                       | 51.1% |
| BMI unknown                       | 122                    | 23.4% | 3                     | 10.0% | 7                              | 18.9% | 112                       | 24.7% |

|                                   | Children (n = 396) |       | Solved (n = 25) |       | Possibly solved (n = 27) |       | Unsolved (n = 344) |       |
|-----------------------------------|--------------------|-------|-----------------|-------|--------------------------|-------|--------------------|-------|
| <b>Sex (n, %)</b>                 |                    |       |                 |       |                          |       |                    |       |
| Male                              | 227                | 57.3% | 15              | 60.0% | 15                       | 59.3% | 197                | 57.3% |
| Female                            | 169                | 42.7% | 10              | 40.0% | 12                       | 44.4% | 147                | 42.7% |
| <b>Age (years)</b>                |                    |       |                 |       |                          |       |                    |       |
| Mean, Median                      | 10.1, 10.2         |       | 10.5, 11.4      |       | 9.8, 8.8                 |       | 10.1, 10.3         |       |
| Range                             | 0.3 – 17.9         |       | 0.4 – 17.8      |       | 1.6 – 17.3               |       | 0.3 – 17.9         |       |
| <b>Other Symptoms (n, %)</b>      |                    |       |                 |       |                          |       |                    |       |
| Additional DD/ID/D                | 221                | 55.8% | 18              | 72.0% | 18                       | 66.7% | 185                | 53.8% |
| No DD/ID/D                        | 175                | 44.2% | 7               | 28.0% | 9                        | 33.3% | 159                | 46.2% |
| <b>Severity of Obesity (n, %)</b> |                    |       |                 |       |                          |       |                    |       |
| Milder Obesity                    | 93                 | 23.5% | 9               | 36.0% | 4                        | 14.8% | 80                 | 23.3% |
| Severe Obesity                    | 226                | 57.1% | 14              | 56.0% | 18                       | 66.7% | 194                | 56.4% |
| BMI unknown                       | 77                 | 19.4% | 2               | 8.0%  | 5                        | 18.5% | 70                 | 20.3% |

|                                   | Adults (n = 125) |       | Solved (n = 5) |       | Possibly solved (n = 10) |       | Unsolved (n = 110) |       |
|-----------------------------------|------------------|-------|----------------|-------|--------------------------|-------|--------------------|-------|
| <b>Sex (n, %)</b>                 |                  |       |                |       |                          |       |                    |       |
| Male                              | 59               | 47.2% | 2              | 40.0% | 8                        | 80.0% | 49                 | 44.5% |
| Female                            | 66               | 52.8% | 3              | 60.0% | 2                        | 20.0% | 61                 | 55.5% |
| <b>Age (years)</b>                |                  |       |                |       |                          |       |                    |       |
| Mean, Median                      | 36.2, 34.1       |       | 31.0, 26.1     |       | 37.5, 36.9               |       | 36.3, 34.0         |       |
| Range                             | 18 – 79.8        |       | 18.1 – 50.2    |       | 23.7 – 57.6              |       | 18 – 79.8          |       |
| <b>Other Symptoms (n, %)</b>      |                  |       |                |       |                          |       |                    |       |
| Additional DD/ID/D                | 78               | 62.4% | 3              | 60.0% | 6                        | 60.0% | 69                 | 62.7% |
| No DD/ID/D                        | 47               | 37.6% | 2              | 40.0% | 4                        | 40.0% | 41                 | 37.3% |
| <b>Severity of Obesity (n, %)</b> |                  |       |                |       |                          |       |                    |       |
| Milder Obesity                    | 40               | 32.0% | 3              | 60.0% | 6                        | 60.0% | 31                 | 28.2% |
| Severe Obesity                    | 40               | 32.0% | 1              | 20.0% | 2                        | 20.0% | 37                 | 33.6% |
| BMI unknown                       | 45               | 36.0% | 1              | 20.0% | 2                        | 20.0% | 42                 | 38.2% |

Supplementary Table 3 - Yield per Subgroup

|                                   | All Patients (N = 521) |       | Solved (n = 30) |      | Permutation<br>Test (p-value) | Possibly solved (n = 37) |      | Unsolved (n = 454) |       |
|-----------------------------------|------------------------|-------|-----------------|------|-------------------------------|--------------------------|------|--------------------|-------|
| <b>All Patients (N, %)</b>        | 521                    | 100%  | 30              | 5.8% |                               | 37                       | 7.1% | 454                | 87.1% |
| <b>Sex (n, %)</b>                 |                        |       |                 |      | 0.499                         |                          |      |                    |       |
| Male                              | 286                    | 54.9% | 17              | 5.9% |                               | 23                       | 8.0% | 246                | 86.0% |
| Female                            | 235                    | 45.1% | 13              | 5.5% |                               | 14                       | 6.0% | 208                | 88.5% |
| <b>Age (n, %)</b>                 |                        |       |                 |      | 0.231                         |                          |      |                    |       |
| Children                          | 396                    | 76.0% | 25              | 6.3% |                               | 27                       | 6.8% | 344                | 86.9% |
| Adults                            | 125                    | 24.0% | 5               | 4.0% |                               | 10                       | 8.0% | 110                | 88.0% |
| Mean, Median (years)              | 16.3, 12.8             |       | 13.8, 13.1      |      |                               | 17.3, 14.4               |      | 16.4, 12.7         |       |
| Range (years)                     | 0.3 – 79.8             |       | 0.4 – 50.2      |      |                               | 1.6 – 57.6               |      | 0.3 – 79.8         |       |
| <b>Other Symptoms (n, %)</b>      |                        |       |                 |      | 0.105                         |                          |      |                    |       |
| Additional DD/ID/D                | 299                    | 57.4% | 21              | 7.0% |                               | 24                       | 8.0% | 254                | 84.9% |
| No DD/ID/D                        | 222                    | 42.6% | 9               | 4.1% |                               | 13                       | 5.9% | 200                | 90.1% |
| <b>Severity of Obesity (n, %)</b> |                        |       |                 |      | 0.147                         |                          |      |                    |       |
| Milder Obesity                    | 133                    | 25.5% | 12              | 9.0% |                               | 10                       | 7.5% | 111                | 83.5% |
| Severe Obesity                    | 266                    | 51.1% | 15              | 5.6% |                               | 20                       | 7.5% | 231                | 86.8% |
| BMI unknown                       | 122                    | 23.4% | 3               | 2.5% |                               | 7                        | 5.7% | 112                | 91.8% |

|                                   | Children (n = 396) |        | Solved (n = 25) |      | Permutation<br>Test (p-value) | Possibly solved (n = 27) |      | Unsolved (n = 344) |       |
|-----------------------------------|--------------------|--------|-----------------|------|-------------------------------|--------------------------|------|--------------------|-------|
| <b>All Children (n, %)</b>        | 396                | 100.0% | 25              | 6.3% |                               | 27                       | 6.8% | 344                | 86.9% |
| <b>Sex (n, %)</b>                 |                    |        |                 |      | 0.479                         |                          |      |                    |       |
| Male                              | 227                | 57.3%  | 15              | 6.6% |                               | 15                       | 6.6% | 197                | 86.8% |
| Female                            | 169                | 42.7%  | 10              | 5.9% |                               | 12                       | 7.1% | 147                | 87.0% |
| <b>Age (years)</b>                |                    |        |                 |      | 0.068                         |                          |      |                    |       |
| Mean, Median                      | 10.1, 10.2         |        | 10.5, 11.4      |      |                               | 9.8, 8.8                 |      | 10.1, 10.3         |       |
| Range                             | 0.3 – 17.9         |        | 0.4 – 17.8      |      |                               | 1.6 – 17.3               |      | 0.3 – 17.9         |       |
| <b>Other Symptoms (n, %)</b>      |                    |        |                 |      | 0.195                         |                          |      |                    |       |
| Additional DD/ID/D                | 221                | 55.8%  | 18              | 8.1% |                               | 18                       | 8.1% | 185                | 83.7% |
| No DD/ID/D                        | 175                | 44.2%  | 7               | 4.0% |                               | 9                        | 5.1% | 159                | 90.9% |
| <b>Severity of Obesity (n, %)</b> |                    |        |                 |      | 0.195                         |                          |      |                    |       |
| Milder Obesity                    | 93                 | 23.5%  | 9               | 9.7% |                               | 4                        | 4.3% | 80                 | 86.0% |
| Severe Obesity                    | 226                | 57.1%  | 14              | 6.2% |                               | 18                       | 8.0% | 194                | 85.8% |
| BMI unknown                       | 77                 | 19.4%  | 2               | 2.6% |                               | 5                        | 6.5% | 70                 | 90.9% |

|                                   | Adults (n = 125) |       | Solved (n = 5) |      | Permutation<br>Test (p-value) | Possibly solved (n = 10) |       | Unsolved (n = 110) |       |
|-----------------------------------|------------------|-------|----------------|------|-------------------------------|--------------------------|-------|--------------------|-------|
| <b>All Adults (n, %)</b>          | 125              | 100%  | 5              | 4.0% |                               | 10                       | 8.0%  | 110                | 88.0% |
| <b>Sex (n, %)</b>                 |                  |       |                |      | 0.552                         |                          |       |                    |       |
| Male                              | 59               | 47.2% | 2              | 3.4% |                               | 8                        | 13.6% | 49                 | 83.1% |
| Female                            | 66               | 52.8% | 3              | 4.5% |                               | 2                        | 3.0%  | 61                 | 92.4% |
| <b>Age (years)</b>                |                  |       |                |      | 0.623                         |                          |       |                    |       |
| Mean, Median (years)              | 36.2, 34.1       |       | 31.0, 26.1     |      |                               | 37.5, 36.9               |       | 36.3, 34.0         |       |
| Range (years)                     | 18 – 79.8        |       | 18.1 – 50.2    |      |                               | 23.7 – 57.6              |       | 18 – 79.8          |       |
| <b>Other Symptoms (n, %)</b>      |                  |       |                |      | 0.308                         |                          |       |                    |       |
| Additional DD/ID/D                | 78               | 62.4% | 3              | 3.8% |                               | 6                        | 7.7%  | 69                 | 88.5% |
| No DD/ID/D                        | 47               | 37.6% | 2              | 4.3% |                               | 4                        | 8.5%  | 41                 | 87.2% |
| <b>Severity of Obesity (n, %)</b> |                  |       |                |      | 0.308                         |                          |       |                    |       |
| Milder Obesity                    | 40               | 32.0% | 3              | 7.5% |                               | 6                        | 15.0% | 31                 | 77.5% |
| Severe Obesity                    | 40               | 32.0% | 1              | 2.5% |                               | 2                        | 5.0%  | 37                 | 92.5% |
| BMI unknown                       | 45               | 36.0% | 1              | 2.2% |                               | 2                        | 4.4%  | 42                 | 93.3% |

Supplementary Table 4 - PanelApps

**ALL SOLVED CASES:**

| Number of Patients | Patients IDs            | Gene / Locus            | Full Gene name                                     | Included in combined panel (PanelApp AUS + UK)? |
|--------------------|-------------------------|-------------------------|----------------------------------------------------|-------------------------------------------------|
| 8                  | 8 – 15                  | <i>MC4R</i>             | Melanocortin 4 receptor                            | yes                                             |
| 3                  | 16 – 18                 | <i>PHIP</i>             | Pleckstrin homology domain-interacting protein     | yes                                             |
| 3                  | 22 – 24                 | <i>SRRM2</i>            | Serine/arginine repetitive matrix protein 2        | no                                              |
| 3                  | 9 <sup>a</sup> , 27, 28 | 16p11.2, proximal       |                                                    | no                                              |
| 2                  | 29, 30                  | 16p11.2, distal         |                                                    | yes                                             |
| 2                  | 1, 2                    | <i>ADNP</i>             | Activity-dependent neuroprotector homeobox         | no                                              |
| 2                  | 19, 20                  | <i>RAI1</i>             | Retinoic acid-induced gene 1                       | no                                              |
| 1                  | 3                       | <i>ALMS1</i>            | Alstrom syndrome 1                                 | yes                                             |
| 1                  | 4                       | <i>CREBBP</i>           | CREB-binding protein                               | no                                              |
| 1                  | 5                       | <i>GNAS</i>             | eotide-binding protein, alpha stimulating activity | yes                                             |
| 1                  | 6                       | <i>LEPR</i>             | Leptin receptor                                    | yes                                             |
| 1                  | 7                       | <i>MAGEL2</i>           | MAGE-like 2                                        | yes                                             |
| 1                  | 21                      | <i>SPG11</i>            | Spastic paraplegia 11                              | no                                              |
| 1                  | 25                      | <i>TRIP12</i>           | Thyroid hormone receptor interactor 12             | no                                              |
| 1                  | 26                      | 2p25.3 ( <i>MYT1L</i> ) | (Myelin transcription factor 1-like)               | yes                                             |
|                    |                         |                         |                                                    | <b>PATIENT SUM: 18/30 = 60.0%</b>               |

<sup>a</sup>: patient both with *MC4R*-variant and proximal 16p11.2 deletion**NON-SYNDROMIC:**

| Number of Patients | Patients IDs       | Gene / Locus      | Included in combined panel (PanelApp AUS + UK)? |
|--------------------|--------------------|-------------------|-------------------------------------------------|
| 6                  | 8 – 10, 12, 13, 15 | <i>MC4R</i>       | yes                                             |
| 2                  | 29, 30             | 16p11.2, distal   | yes                                             |
| 1                  | 9 <sup>a</sup>     | 16p11.2, proximal | no                                              |
| 1                  | 24                 | <i>SRRM2</i>      | no                                              |
|                    |                    |                   | <b>PATIENT SUM: 8/9 = 88.9%</b>                 |

<sup>a</sup>: patient both with *MC4R*-variant and proximal 16p11.2 deletion**SYNDROMIC:**

| Number of Patients | Patients IDs | Gene / Locus            | Included in combined panel (PanelApp AUS + UK)? |
|--------------------|--------------|-------------------------|-------------------------------------------------|
| 3                  | 16 – 18      | <i>PHIP</i>             | yes                                             |
| 2                  | 1, 2         | <i>ADNP</i>             | no                                              |
| 2                  | 11, 14       | <i>MC4R</i>             | yes                                             |
| 2                  | 19, 20       | <i>RAI1</i>             | no                                              |
| 2                  | 22, 23       | <i>SRRM2</i>            | no                                              |
| 2                  | 27, 28       | 16p11.2, proximal       | no                                              |
| 1                  | 3            | <i>ALMS1</i>            | yes                                             |
| 1                  | 4            | <i>CREBBP</i>           | no                                              |
| 1                  | 5            | <i>GNAS</i>             | yes                                             |
| 1                  | 6            | <i>LEPR</i>             | yes                                             |
| 1                  | 7            | <i>MAGEL2</i>           | yes                                             |
| 1                  | 21           | <i>SPG11</i>            | no                                              |
| 1                  | 25           | <i>TRIP12</i>           | no                                              |
| 1                  | 26           | 2p25.3 ( <i>MYT1L</i> ) | yes                                             |
|                    |              |                         | <b>PATIENT SUM: 10/21 = 47.6%</b>               |
